# Supplementary material
Source: Springer Nature journal article supplement (https://www.springermedizin.de/resource/supplementary/12958_2010_703_MOESM4_ESM.pdf/9568628)

**A** Mean ( $\pm$ SD) of the % of capacitated sperm cells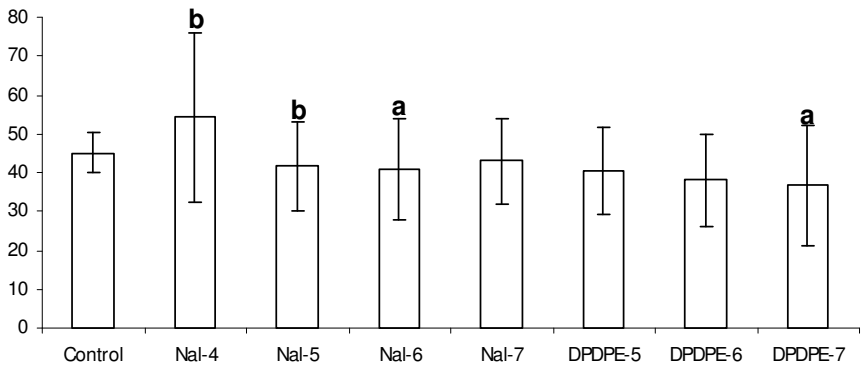**B** Mean ( $\pm$ SD) of the % of acrosome reacted sperm cells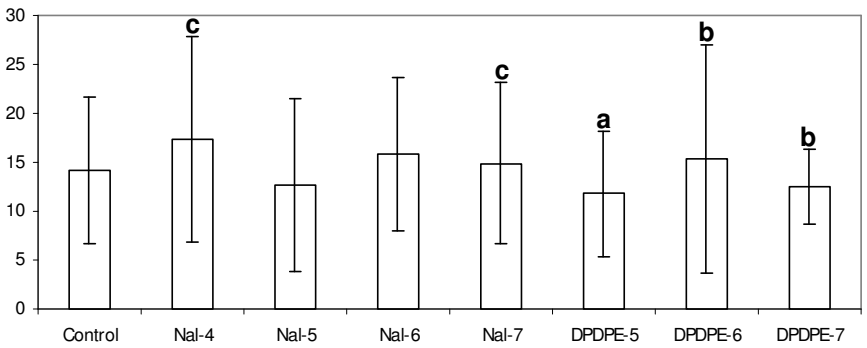**C** Mean ( $\pm$ SD) of the % of dead sperm cells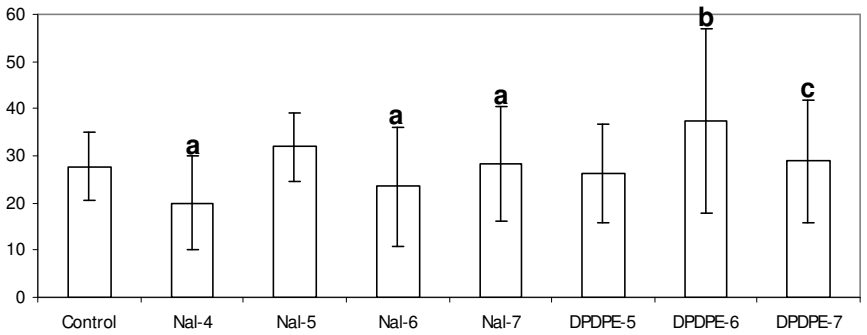**D** Mean ( $\pm$ SD) of the % of spermatozoa with active mitochondria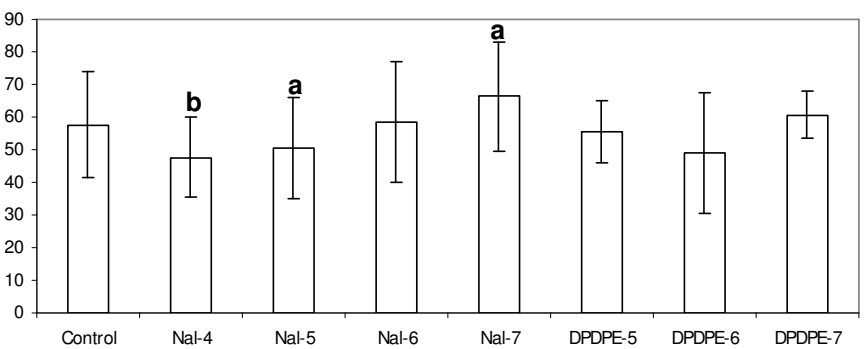

Supplement: MOESM4 [file 9568628]
